# Supplementary material
Source: PubMed Central journal article supplement (PMC1239984)
Supplement: bmj_331_7519_765__1.pdf [file bmj_331_7519_765__1.pdf]

## **Key organisations and processes for drug regulation in Mozambique and Zimbabwe**

### **Ministry of Health and advisory committees**

*Mozambique*—the Ministry of Health produces treatment guidelines and the national formulary of medicines, supported by the Therapeutic Commission

*Zimbabwe*—the Ministry of Health and Child Welfare produces treatment guidelines and an essential drugs list, supported by the National Drug and Therapeutic Policy Advisory Committee and the Medicine Control Authority of Zimbabwe

### **Drug registration**

*Mozambique*—formal registration of drugs started only in 2001

*Zimbabwe*—the Medicine Control Authority of Zimbabwe registers drugs and ensures their safety

### **Compiling of the national formulary of medicines and essential drugs list**

*Mozambique*—the national formulary of medicines determines which medicines can be acquired and distributed in the national health system

*Zimbabwe*—priority for central purchasing is given to first line drugs listed in the essential drugs list and used at all levels of the health service

### **Central Medical Stores**

*Mozambique and Zimbabwe*—Central Medical Stores are responsible for the acquisition and distribution of medicines

### **Extra web references [as supplied by authors]**

- W1. Trouiller P, Torreele E, Olliaro P, White N, Foster S, Wirth D, et al. Drugs for neglected diseases: a failure of the market and a public health failure? *Trop Med Int Health* 2001;6(11):945-951.
- W2. Wheeler C, Berkley S. Initial lessons from public-private partnerships in drug and vaccine development. *Bull World Health Organ* 2001;79(8):728-734.
- W3. AbouZahr C. Global burden of maternal death and disability. *Br Med Bull* 2003;67(1):1-11.
- W4. Duley L, Henderson-Smart D. Magnesium sulphate versus diazepam for eclampsia. *The Cochrane Database of Systematic Reviews* 2003(3):Art. No.: CD000127. DOI: 10.1002/14651858.CD000127.
- W5. Duley L, Henderson-Smart D. Magnesium sulphate versus phenytoin for eclampsia. *The Cochrane Database of Systematic Reviews* 2003(3):Art. No.: CD000128. DOI: 10.1002/14651858.CD000128.
- W6. Garner P, Kale R, Dickson R, Dans T, Salinas R. Getting research findings into practice: Implementing research findings in developing countries. *Br Med J* 1998;317(7157):531-535.
- W7. Mahomed K, Garner P, Duley L. Tocolytic magnesium sulphate and paediatric mortality. *Lancet* 1998;351(9098):293.
- W8. Graham Dukes M. Priority medicines and the world. *Bull World Health Organ* 2005;83(5):324.
- W9. Fretheim A, Aaserud M, Oxman A. The potential savings of using thiazides as the first choice antihypertensive drug: cost-minimisation analysis. *BMC Health Serv Res* 2003;3(1):18.

Key events and system failures in use of magnesium sulphate for the management of eclampsia in Zimbabwe and Mozambique

| <b>Date</b> | <b>Key events in Mozambique</b>                                                                                                                                                                                                                      | <b>Date</b> | <b>Key events in Zimbabwe</b>                                                                                                                                                     |
|-------------|------------------------------------------------------------------------------------------------------------------------------------------------------------------------------------------------------------------------------------------------------|-------------|-----------------------------------------------------------------------------------------------------------------------------------------------------------------------------------|
| 1981        | Magnesium sulphate use initiated in academic settings (Maputo Central Hospital, the national teaching hospital)                                                                                                                                      | 1980-5      | Magnesium sulphate used in central hospitals by obstetricians who favour the drug                                                                                                 |
| 1985        | Obstetric guidelines at Maputo Central Hospital recommend magnesium sulphate as first line treatment for eclampsia                                                                                                                                   | 1985        | Essential drug list updated, but magnesium sulphate not included                                                                                                                  |
| 1989        | Trial comparing magnesium sulphate with diazepam for eclampsia in Maputo Central Hospital convinces obstetricians that magnesium sulphate is efficacious (unpublished)                                                                               | 1989        | Essential drug list updated, but magnesium sulphate not included                                                                                                                  |
| 1990        | National obstetric guidelines recommend magnesium sulphate as first line treatment for eclampsia, but it is used mainly in Maputo Central Hospital and acquired directly from importers, depending on availability of funds                          |             |                                                                                                                                                                                   |
| 1980-99     | Gap in updating national formulary of medicines. List of purchases is compiled that includes medicines listed in the formulary and drugs regarded as necessary by clinicians. Magnesium sulphate is not added to this list                           | 1993-5      | Harare participates as a collaborative centre in eclampsia trial                                                                                                                  |
| <b>1995</b> | <b>Collaborative eclampsia trial published</b>                                                                                                                                                                                                       |             |                                                                                                                                                                                   |
| 1999        | Formulary updated. Magnesium sulphate not included in main formulary. Medicines not listed in the formulary could still be acquired, but only with authorisation of the Ministry of Health after a request                                           | 1995-6      | Findings from eclampsia trial begin to influence policy, including the National Drug and Therapeutics Policy Advisory Committee                                                   |
| 2001-2      | An exchange of correspondence between clinical staff, the Ministry of Health pharmaceutical department, the Therapeutic Commission and the Family Health Department results in authorisation for the purchase of magnesium sulphate. Central Medical | 1998        | The Directorate of Pharmacy Services and the Ministry of Health and Child Welfare produce the booklet <i>Drug information for Primary Care</i> . Magnesium sulphate not discussed |

|             |                                                                                                             |           |                                                                                                                                                                                                                                                                                                          |
|-------------|-------------------------------------------------------------------------------------------------------------|-----------|----------------------------------------------------------------------------------------------------------------------------------------------------------------------------------------------------------------------------------------------------------------------------------------------------------|
|             | Stores begin regular purchase of magnesium sulphate                                                         |           |                                                                                                                                                                                                                                                                                                          |
|             |                                                                                                             | 1995-00   | Erratic supplies of magnesium sulphate limit its use                                                                                                                                                                                                                                                     |
|             |                                                                                                             | 2000      | Magnesium sulphate included in essential drugs list. Standard treatment guidelines on how to manage eclampsia included in the list. Magnesium sulphate included as second line agent. Magnesium sulphate also classified as a “vital” drug—that is, efforts must be made to ensure constant availability |
|             |                                                                                                             | 1998-2001 | Harare Maternity Hospital participates as a collaborating centre in the Magpie trial                                                                                                                                                                                                                     |
| <b>2003</b> | <b>Magpie trial published</b>                                                                               |           |                                                                                                                                                                                                                                                                                                          |
| 2003        | Magnesium sulphate is distributed to peripheral units, but only when requested by clinical staff            | 2005      | Magnesium sulphate only in use at central hospitals in Harare. Dissemination and support to lower levels not taking place. Meetings on national maternal mortality are resumed after four years                                                                                                          |
| 2005        | Requests for magnesium sulphate are sporadic, with some areas of the country not making any requests at all |           |                                                                                                                                                                                                                                                                                                          |
